# Supplementary material for: Metabolomic analysis provides novel chemotaxonomic characteristics for phenotypic cultivars of tree peony
Source: Royal Society of Chemistry journal article supplement (doi:10.1039/c4ay01028k), 2014-07-17

## Supplementary information

**Figure S1** The MS or MS/MS spectra of identified metabolites in the root bark extracts from tree peony.

**Figure S2** The MS/MS spectra of galloylpaeoniflorin at the different collision energies: (A) 10 eV, (B) 20 eV, (C) 30 eV and (D) 40 eV.

Figure S1

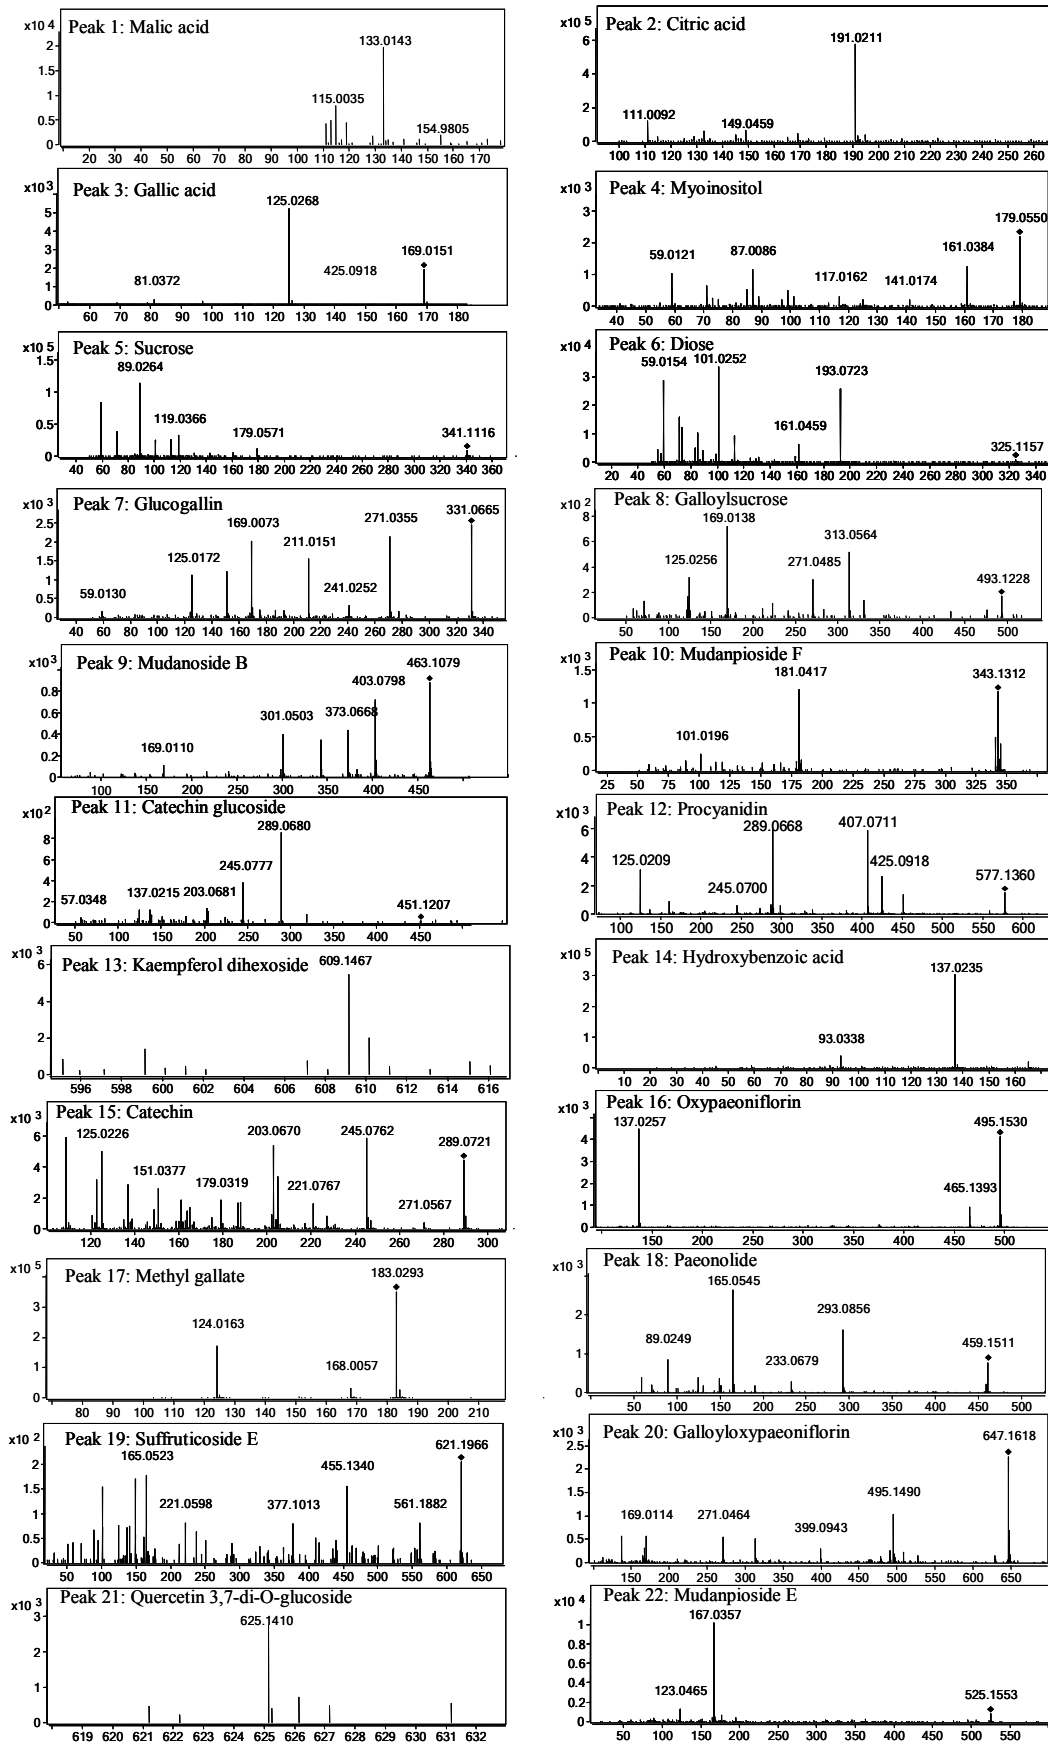

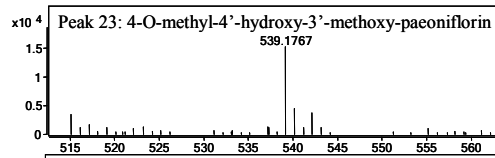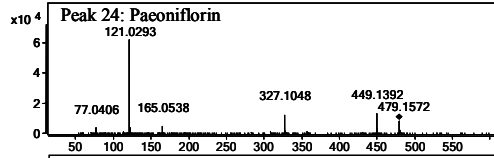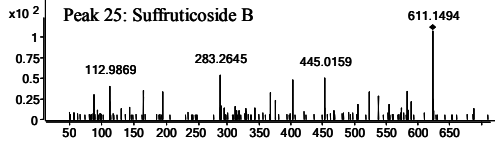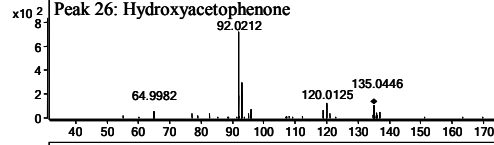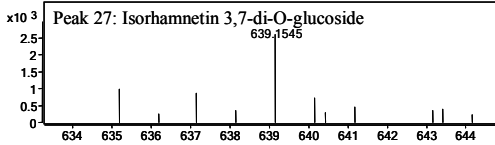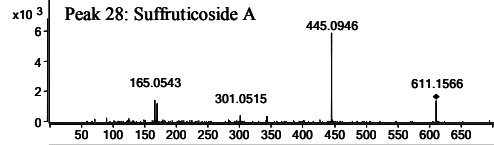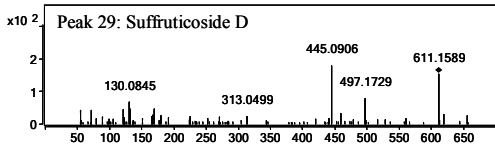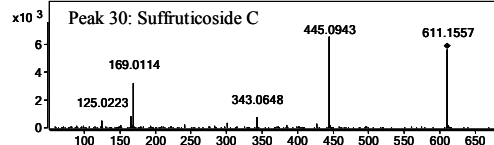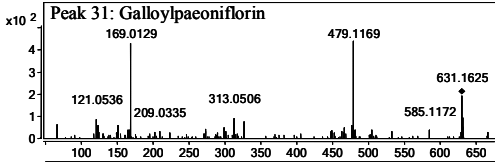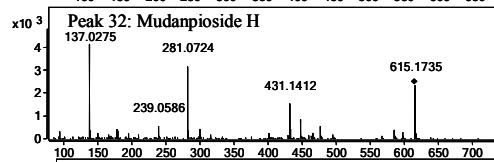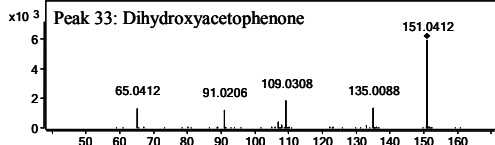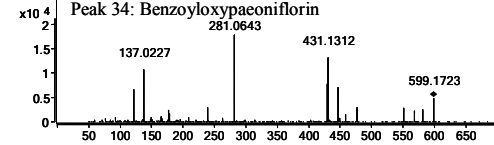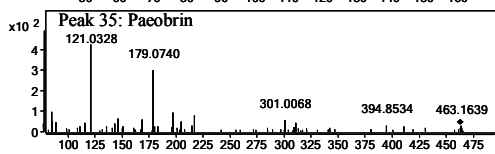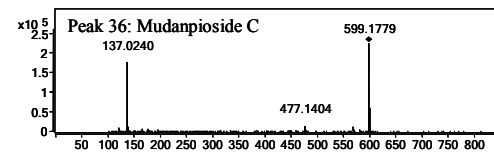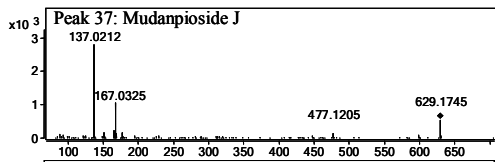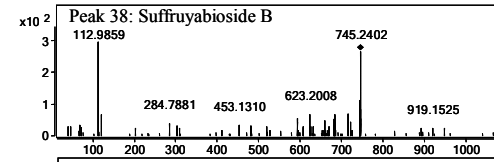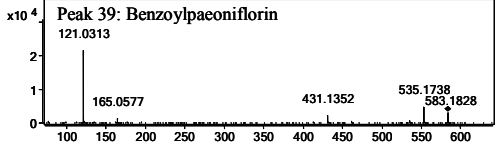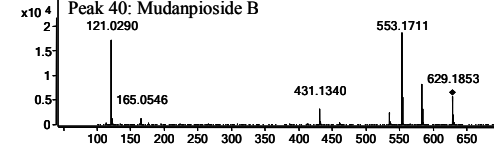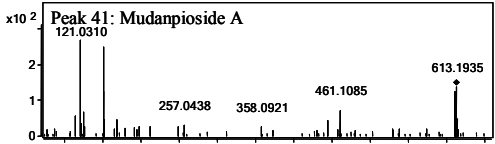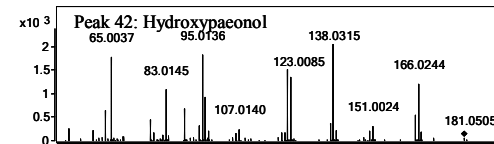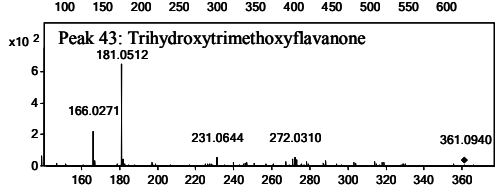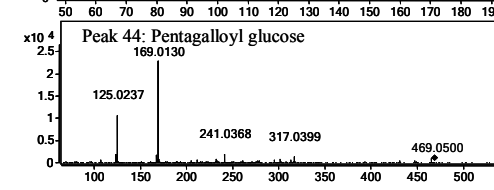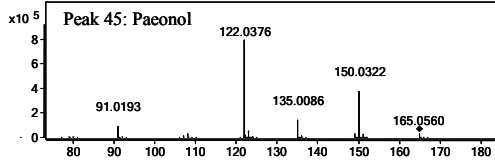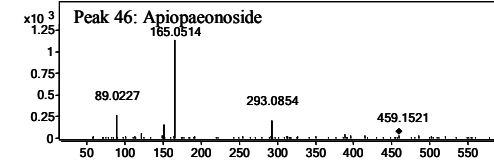

Figure S2

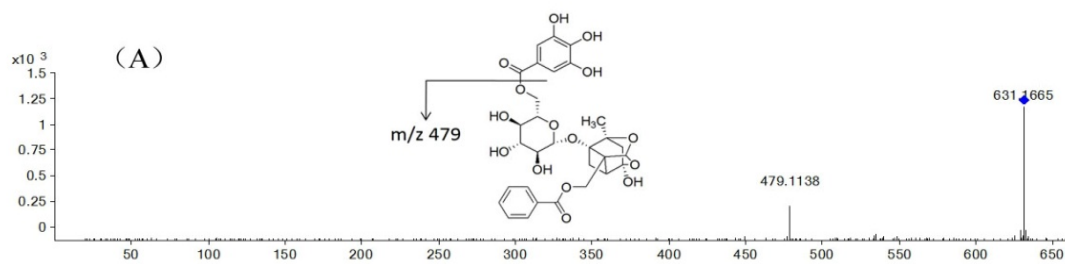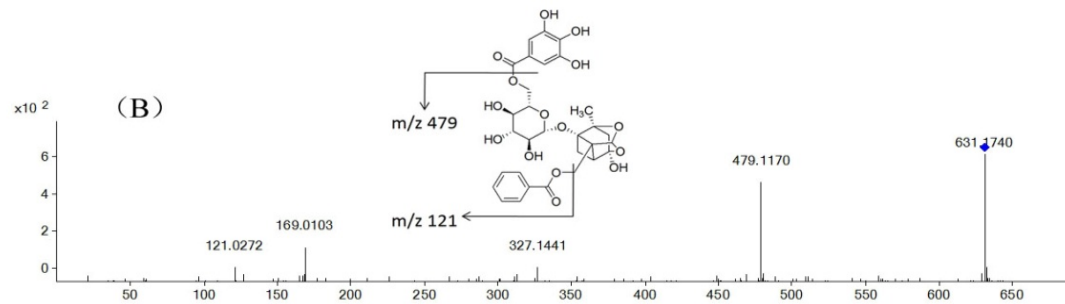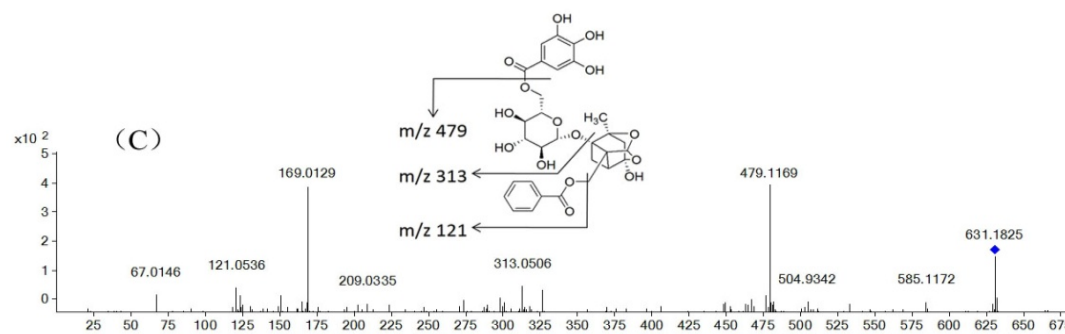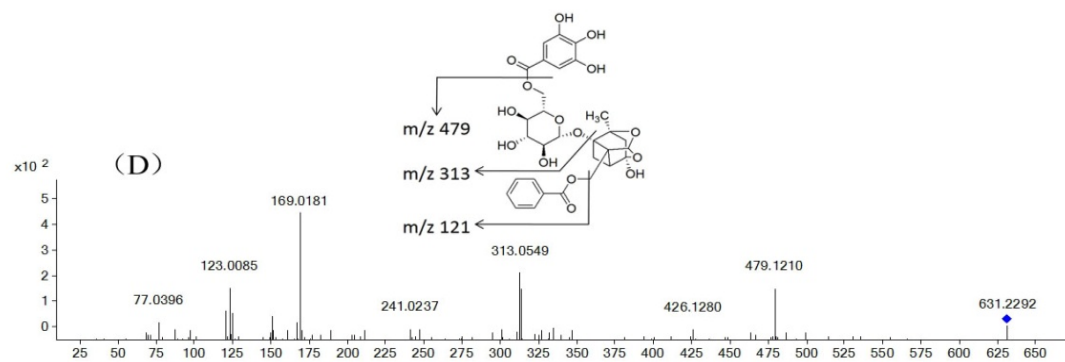

Supplement: c4ay01028k1.pdf [file c4ay01028k1.pdf]
